# Supplementary material for: Efficient preparation of nanocatalysts. Case study: green synthesis of supported Pt nanoparticles by using microemulsions and mangosteen peel extract
Source: Royal Society of Chemistry journal article supplement (doi:10.1039/d2ra04134k), 2022-01-01
Supplement: d2ra04134k1.pdf [file d2ra04134k1.pdf]

## Supporting Information

### Efficient Preparation of Nanocatalysts Case Study: Green Synthesis of Supported Pt Nanoparticles by Using Microemulsions and Mangosteen Peel Extract

Riny Yolandha Parapat,<sup>a,b</sup> Michael Schwarze,<sup>b</sup> Alwin Ibrahim,<sup>a</sup> Mino Tasbihi,<sup>b</sup> Reinhard Schomäcker<sup>b</sup>

<sup>a</sup>Chem. Eng. Dept. of Institut Teknologi Nasional Bandung, PHH. Mustopha 23, 40124 Bandung, Indonesia.

<sup>b</sup>Department of Chemistry, Technische Universität Berlin, Straße des 17. Juni 124, 10623 Berlin, Germany.

#### 1. The complete TEM and EDX analysis of Pt NPs after synthesized by microemulsions

View002 – Pt Mango vol 1:5

JEOL EDS 1/1

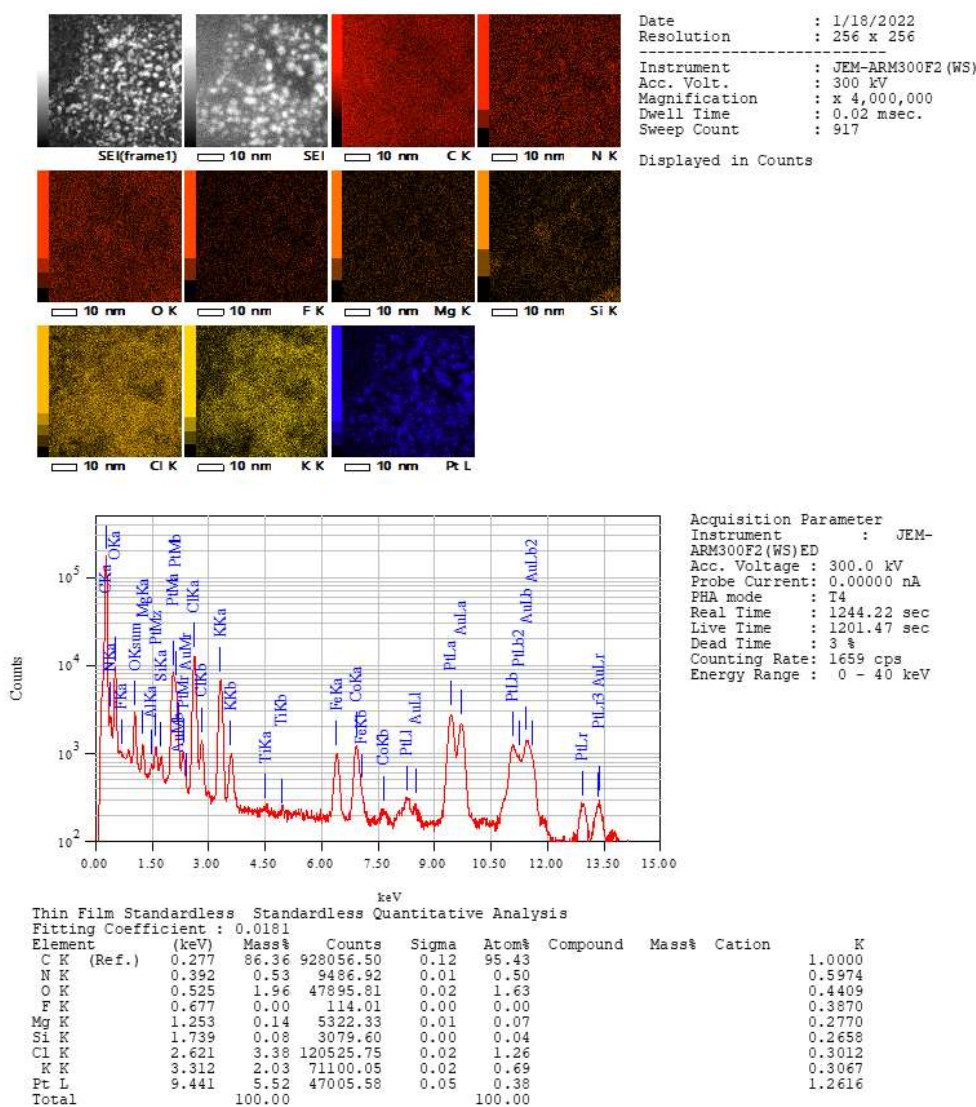

Note: specimen is changing over time.

Particles merge and a C-contamination layer spreads over the ROI (compare SEI(frame1) with SEI).

SEI (frame1) = before the EDX-acquisition --- SEI = last image of the EDX-acquisition

JED-2300 AnalysisStation

JEOL

Fig. S1 Complete TEM - EDX investigation of Pt NPs in the microemulsion before deposited on Al<sub>2</sub>O<sub>3</sub>

## 2. Anova Tables for the Yield and Activity of Pt/Al<sub>2</sub>O<sub>3</sub>

The significant factors that affect the Yield are A, B and the CD interactions, where A, B, C and D are amount of Pt in precursor, amount of reductant, synthesis time, and mass fraction of surfactant, respectively.

**Table 1. Analysis of Variance for Yield with  $\alpha = 0.05$**

| Source            | DF | Adj SS  | Adj MS  | F-Value | P-Value      |
|-------------------|----|---------|---------|---------|--------------|
| Model             | 14 | 2593.38 | 185.241 | 2.29    | 0.057        |
| Linear            | 4  | 1750.45 | 437.612 | 5.41    | 0.006        |
| <b>A</b>          | 1  | 989.15  | 989.146 | 12.22   | <b>0.003</b> |
| <b>B</b>          | 1  | 454.67  | 454.673 | 5.62    | <b>0.031</b> |
| C                 | 1  | 218.60  | 218.599 | 2.70    | 0.120        |
| D                 | 1  | 88.03   | 88.029  | 1.09    | 0.312        |
| Square            | 4  | 0.00    | 0.000   | 0.00    | 1.000        |
| A*A               | 1  | 0.00    | 0.000   | 0.00    | 1.000        |
| B*B               | 1  | 0.00    | 0.000   | 0.00    | 1.000        |
| C*C               | 1  | 0.00    | 0.000   | 0.00    | 1.000        |
| D*D               | 1  | 0.00    | 0.000   | 0.00    | 1.000        |
| 2-Way Interaction | 6  | 842.93  | 140.489 | 1.74    | 0.177        |
| A*B               | 1  | 155.88  | 155.875 | 1.93    | 0.184        |
| A*C               | 1  | 246.96  | 246.961 | 3.05    | 0.100        |
| A*D               | 1  | 5.19    | 5.187   | 0.06    | 0.803        |
| B*C               | 1  | 23.16   | 23.160  | 0.29    | 0.600        |
| B*D               | 1  | 48.70   | 48.703  | 0.60    | 0.449        |
| <b>C*D</b>        | 1  | 363.05  | 363.045 | 4.49    | <b>0.050</b> |
| Error             | 16 | 1294.60 | 80.913  |         |              |
| Total             | 30 | 3887.98 |         |         |              |

The significant factors that affect the Pt Activity are A, B and the AD and BD interactions, where A, B, C and D are amount of Pt in precursor, amount of reductant, synthesis time, and mass fraction of surfactant, respectively.

**Table 2. Analysis of Variance for Activity with  $\alpha = 0.05$**

| Source            | DF | Adj SS   | Adj MS  | F-Value | P-Value      |
|-------------------|----|----------|---------|---------|--------------|
| Model             | 14 | 14345759 | 1024697 | 4.52    | 0.003        |
| Linear            | 4  | 9689018  | 2422255 | 10.68   | 0.000        |
| <b>A</b>          | 1  | 7746048  | 7746048 | 34.16   | <b>0.000</b> |
| <b>B</b>          | 1  | 1846802  | 1846802 | 8.14    | <b>0.011</b> |
| C                 | 1  | 93150    | 93150   | 0.41    | 0.531        |
| D                 | 1  | 3019     | 3019    | 0.01    | 0.910        |
| Square            | 4  | 0        | 0       | 0.00    | 1.000        |
| A*A               | 1  | 0        | 0       | 0.00    | 1.000        |
| B*B               | 1  | 0        | 0       | 0.00    | 1.000        |
| C*C               | 1  | 0        | 0       | 0.00    | 1.000        |
| D*D               | 1  | 0        | 0       | 0.00    | 1.000        |
| 2-Way Interaction | 6  | 4656741  | 776123  | 3.42    | 0.023        |
| A*B               | 1  | 422500   | 422500  | 1.86    | 0.191        |
| A*C               | 1  | 209764   | 209764  | 0.93    | 0.350        |
| <b>A*D</b>        | 1  | 1365392  | 1365392 | 6.02    | <b>0.026</b> |
| B*C               | 1  | 379764   | 379764  | 1.67    | 0.214        |
| <b>B*D</b>        | 1  | 1795600  | 1795600 | 7.92    | <b>0.012</b> |
| C*D               | 1  | 483720   | 483720  | 2.13    | 0.163        |
| Error             | 16 | 3627961  | 226748  |         |              |
| Total             | 30 | 17973720 |         |         |              |

## 2. FTIR analysis of $\text{Al}_2\text{O}_3$ , $\text{Pt}/\text{Al}_2\text{O}_3$ and the Mangosteen Peel

The absence of any residual organic species on the Pt catalyst was confirmed by the FTIR analysis

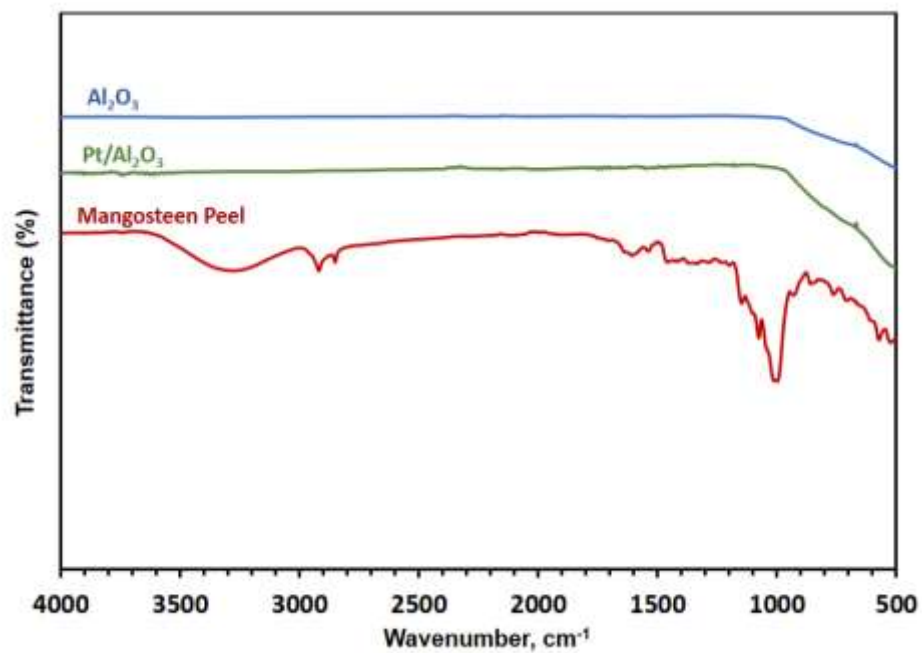

Fig. S2 FTIR analysis of  $\text{Al}_2\text{O}_3$ ,  $\text{Pt}/\text{Al}_2\text{O}_3$  and the Mangosteen Peel
